# Supplementary material for: Continuous gas/liquid–liquid/liquid flow synthesis of 4-fluoropyrazole derivatives by selective direct fluorination
Source: PubMed Central journal article supplement (PMC3168861; doi:10.3762/bjoc.7.120), 2011-08-02

# Supporting Information File 2

for

## **Continuous gas/liquid–liquid/liquid flow synthesis of 4-fluoropyrazole derivatives by selective direct fluorination**

Jessica R. Breen<sup>1</sup>, Graham Sandford<sup>1\*</sup>, Dmitrii S. Yufit<sup>2</sup>, Judith A. K. Howard<sup>2</sup>, Jonathan Fray<sup>3</sup> and Bhairavi Patel<sup>3</sup>

Address: <sup>1</sup>Department of Chemistry, Durham University, South Road, Durham, DH1 3LE, UK; <sup>2</sup>Chemical Crystallography Group, Department of Chemistry, Durham University, South Road, Durham, DH1 3LE, UK and <sup>3</sup>Pfizer Global Research & Development, Ramsgate Road, Sandwich, Kent, CT13 9NJ, UK

Email: Graham Sandford\* - [Graham.Sandford@durham.ac.uk](mailto:Graham.Sandford@durham.ac.uk)

\*Corresponding author

## **NMR spectra**

### 4-Fluoro-3,5-dimethyl-1H-pyrazole (4a)

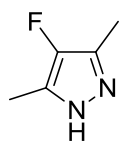

$^1\text{H}$  NMR (700 MHz,  $\text{CDCl}_3$ ,  $\text{Me}_4\text{Si}$ )

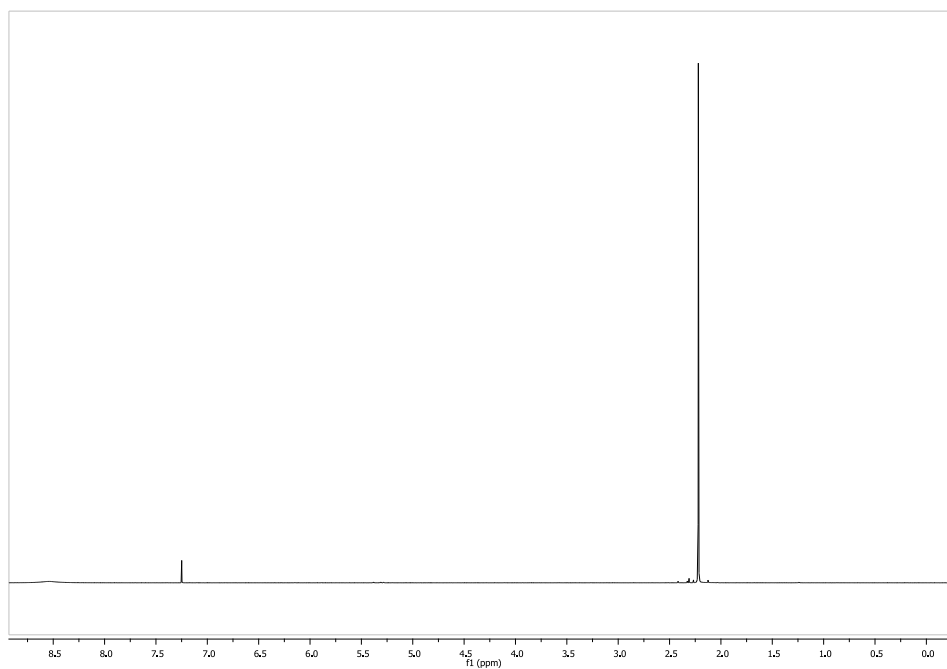

$^{19}\text{F}$  NMR (658 MHz,  $\text{CDCl}_3$ )

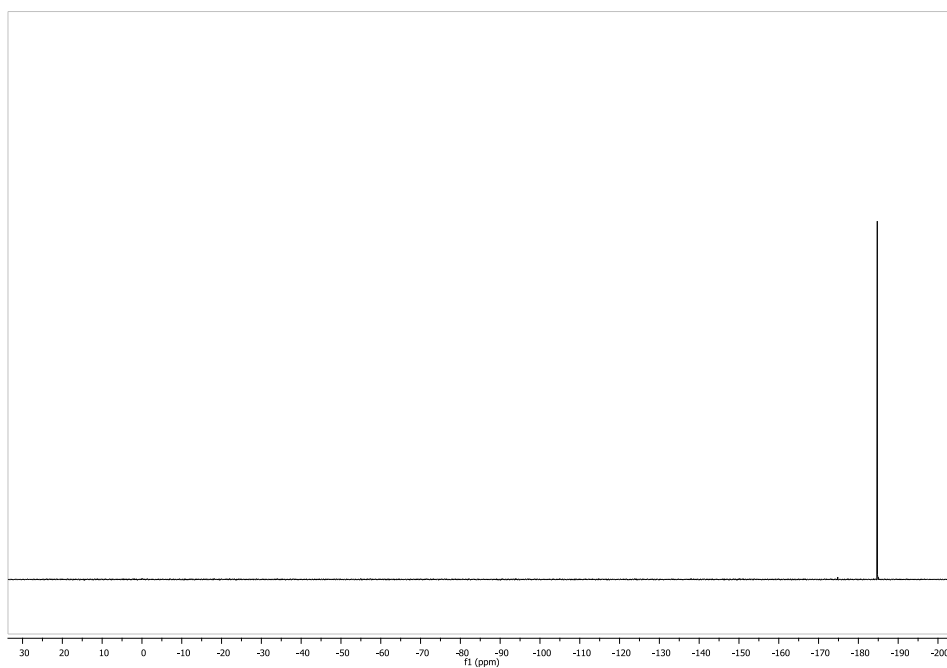

$^{13}\text{C}$  NMR (176 MHz,  $\text{CDCl}_3$ ,  $\text{Me}_4\text{Si}$ )

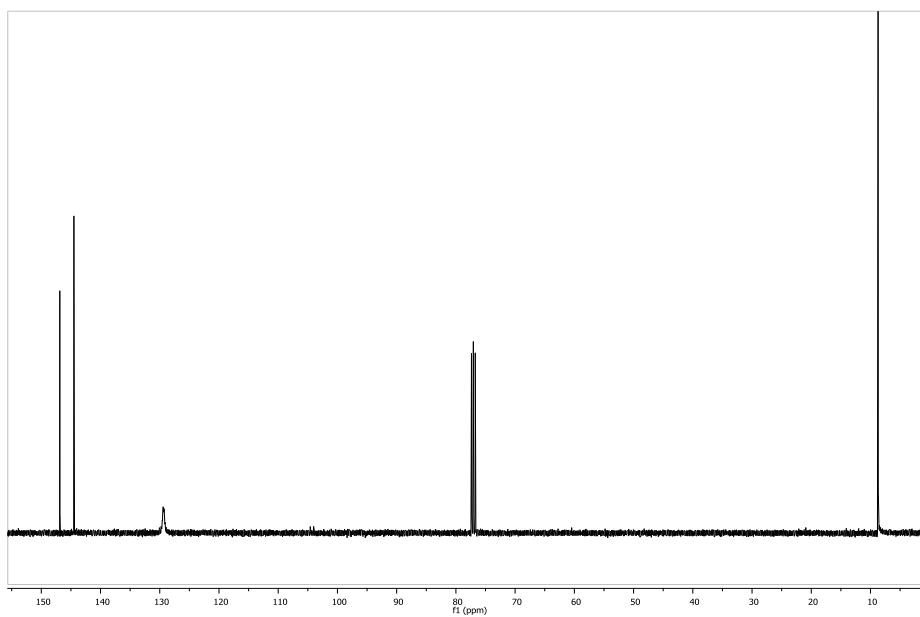

### 4-Fluoro-1,3,5-trimethyl-1H-pyrazole (4b)

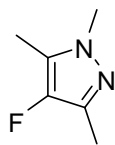

$^1\text{H}$  NMR (700 MHz,  $\text{CDCl}_3$ ,  $\text{Me}_4\text{Si}$ )

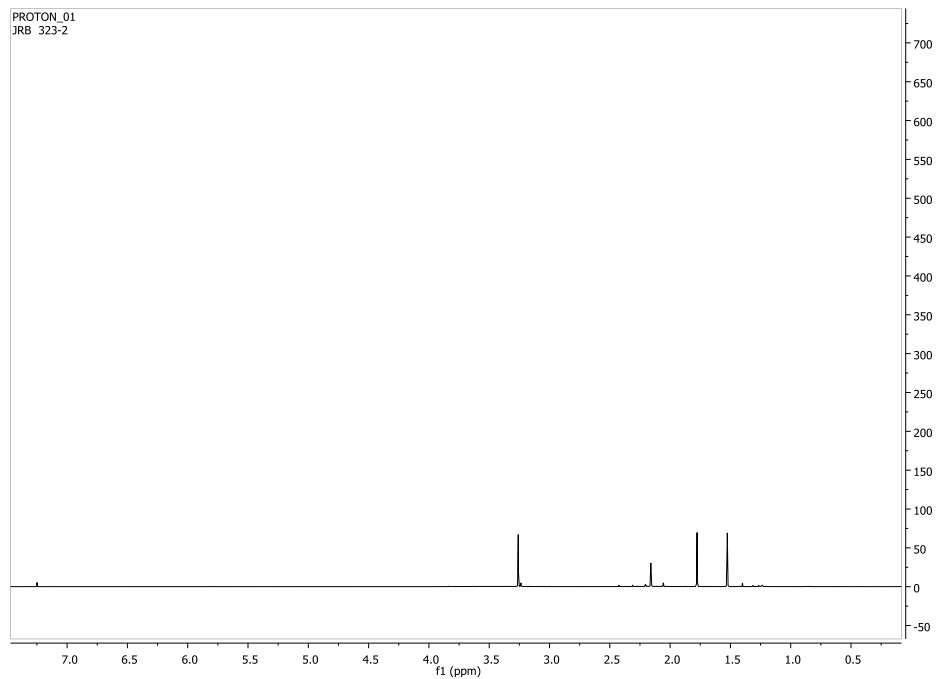

$^{19}\text{F}$  NMR (658 MHz,  $\text{CDCl}_3$ ,  $\text{CFCl}_3$ )

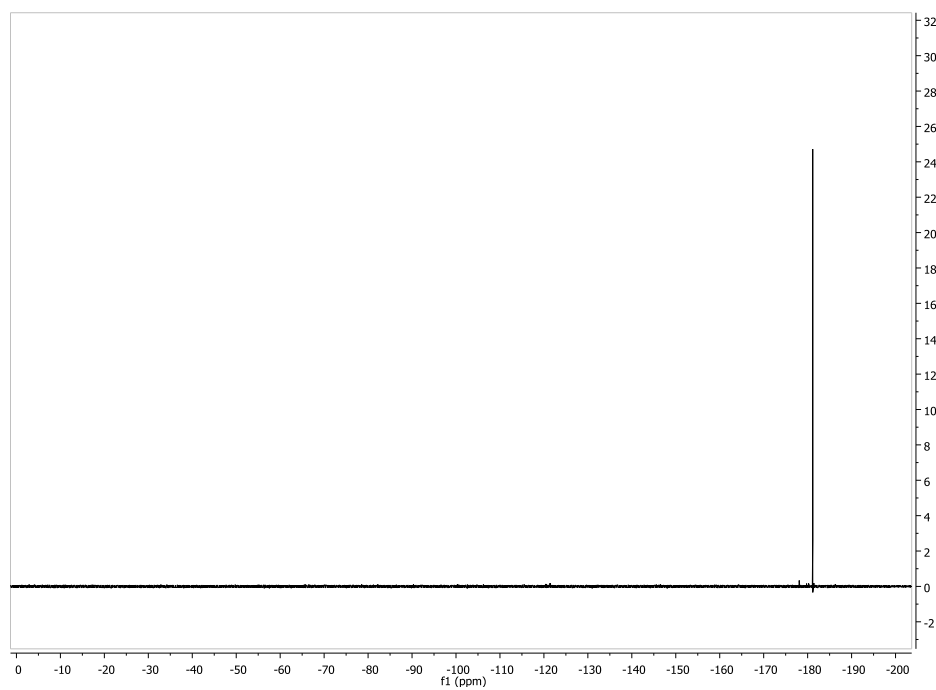

$^{13}\text{C}$  NMR (176 MHz,  $\text{CDCl}_3$ ,  $\text{Me}_4\text{Si}$ )

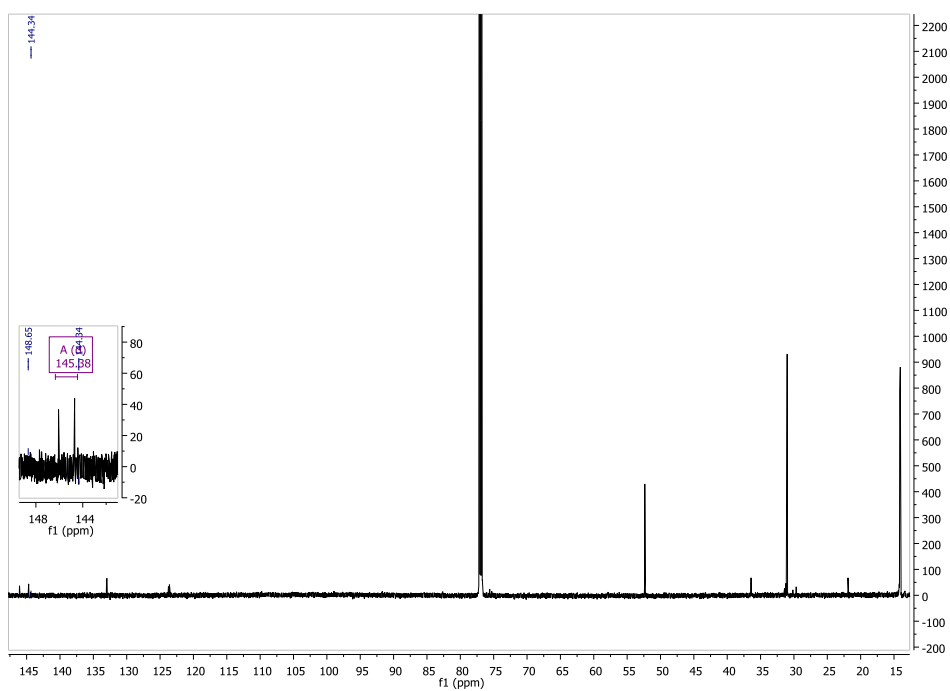

### 4-Fluoro-3,5-dimethyl-1-phenyl-1H-pyrazole (4c)

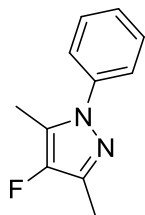

$^1\text{H}$  NMR (700 MHz,  $\text{CDCl}_3$ ,  $\text{Me}_4\text{Si}$ )

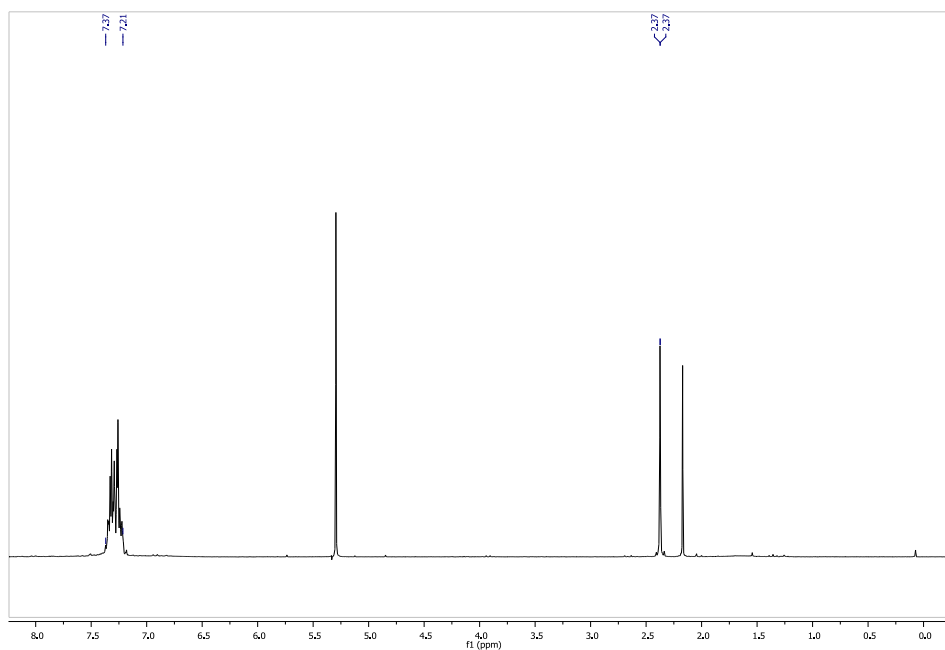

$^{19}\text{F}$  NMR (658 MHz,  $\text{CDCl}_3$ ,  $\text{CFCl}_3$ )

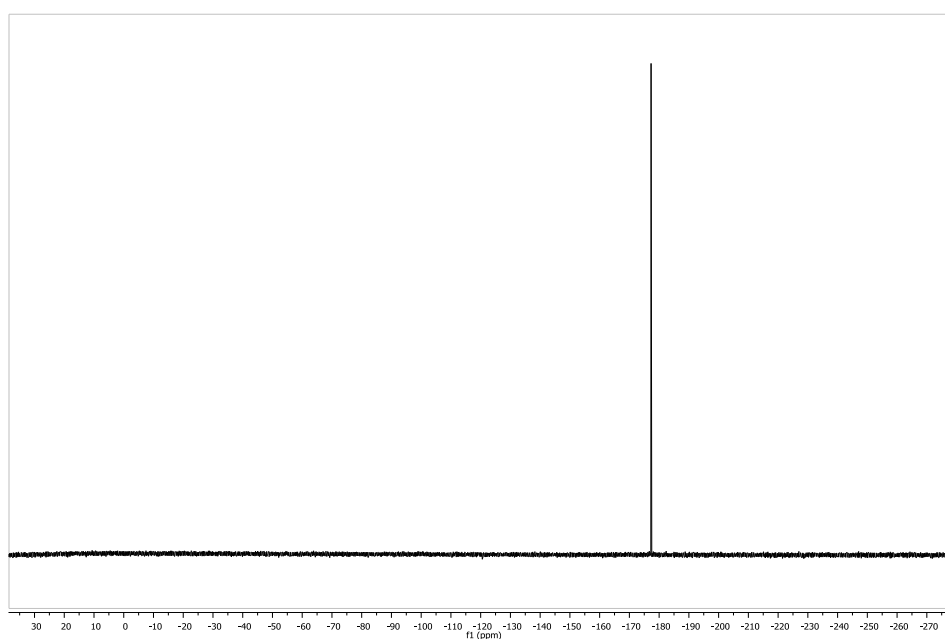

$^{13}\text{C}$  NMR (176 MHz,  $\text{CDCl}_3$ ,  $\text{Me}_4\text{Si}$ )

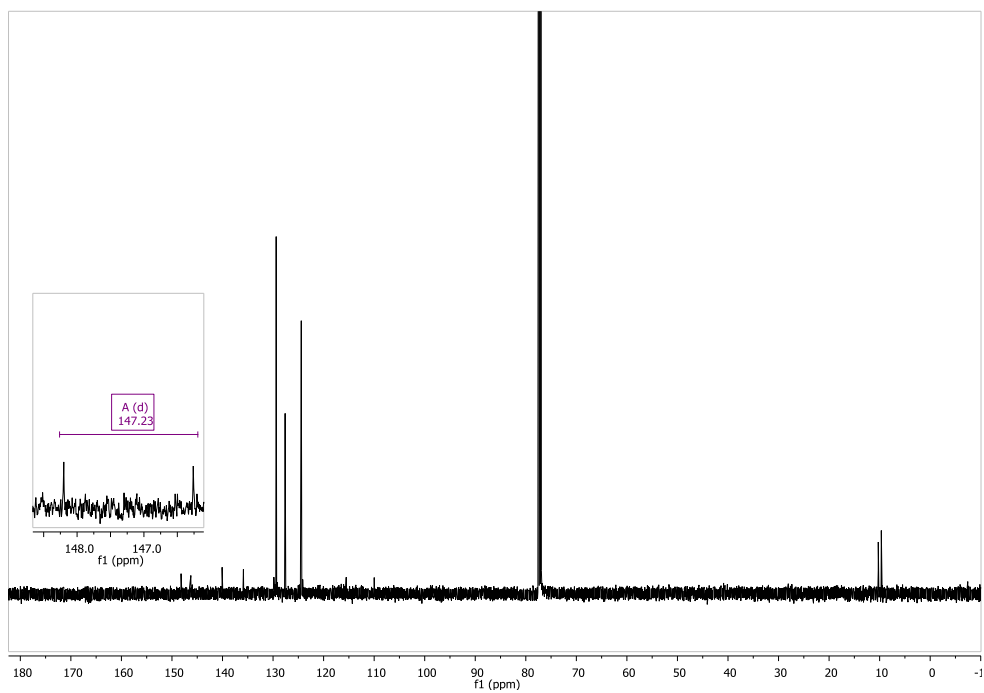

### 3,5-Diethyl-4-fluoro-1H-pyrazole (4d)

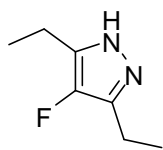

$^1\text{H}$  NMR (700 MHz,  $\text{CDCl}_3$ ,  $\text{Me}_4\text{Si}$ )

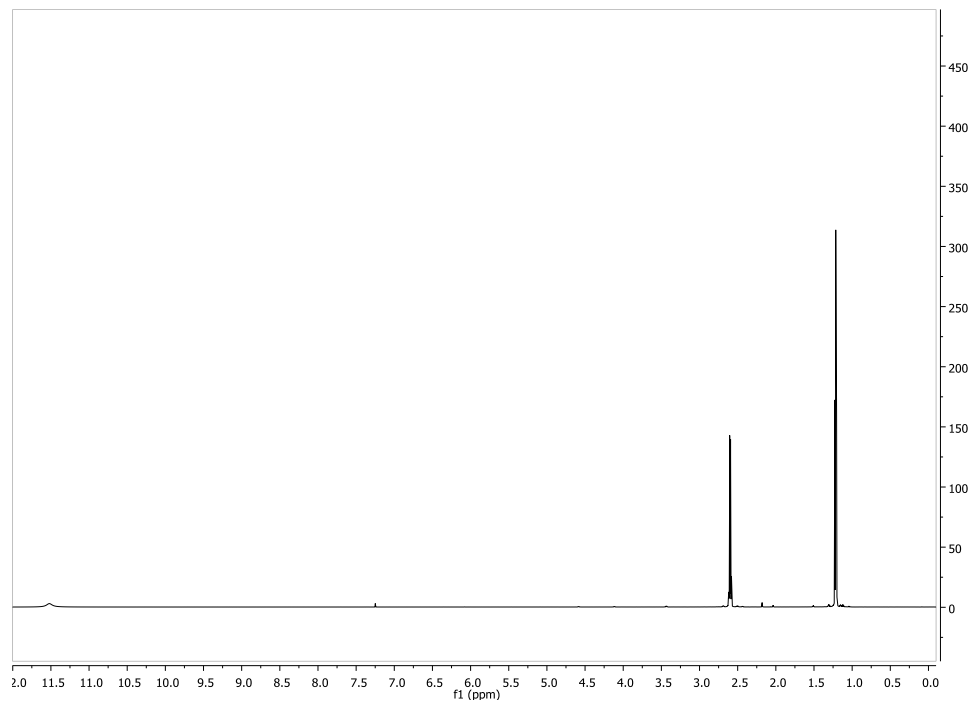

$^{19}\text{F}$  NMR (658 MHz,  $\text{CDCl}_3$ ,  $\text{CFCl}_3$ )

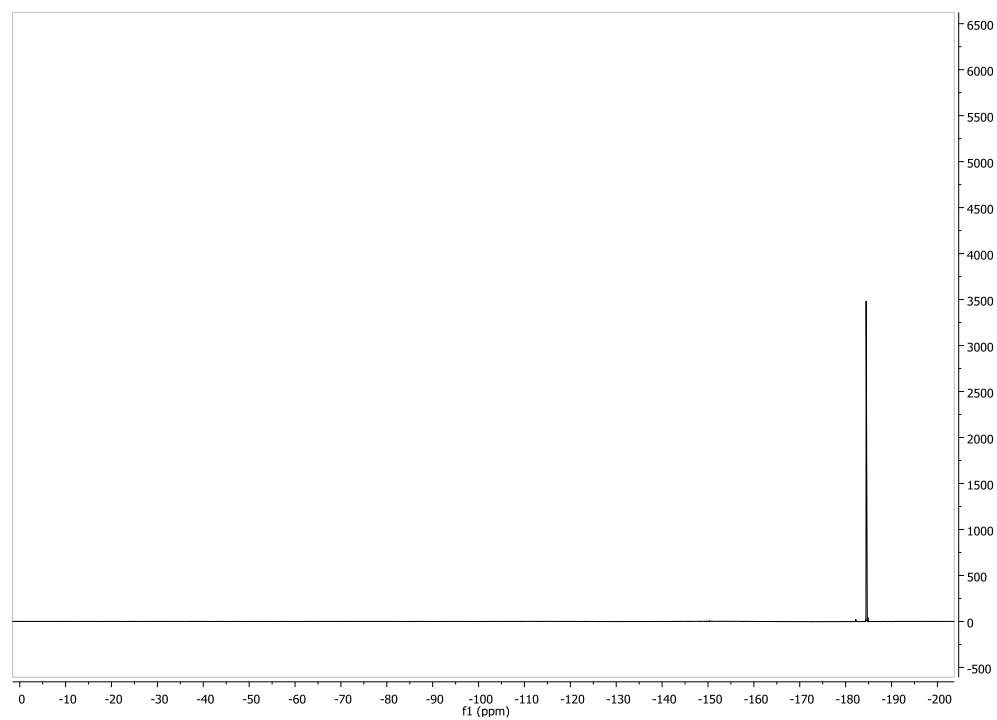



$^{13}\text{C}$  NMR (176 MHz,  $\text{CDCl}_3$ ,  $\text{Me}_4\text{Si}$ )

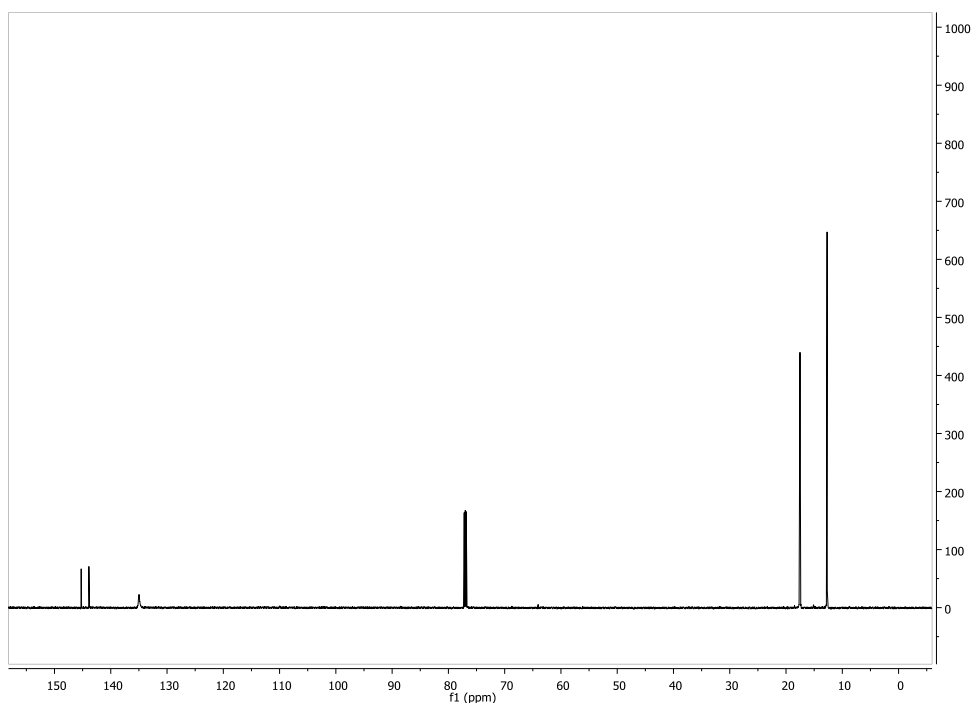

**3-*tert*-Butyl-4-fluoro-5-methyl-1*H*-pyrazole (4e)**

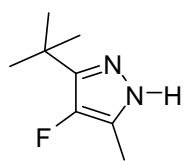

<sup>1</sup>H NMR (700 MHz, CDCl<sub>3</sub>, Me<sub>4</sub>Si)

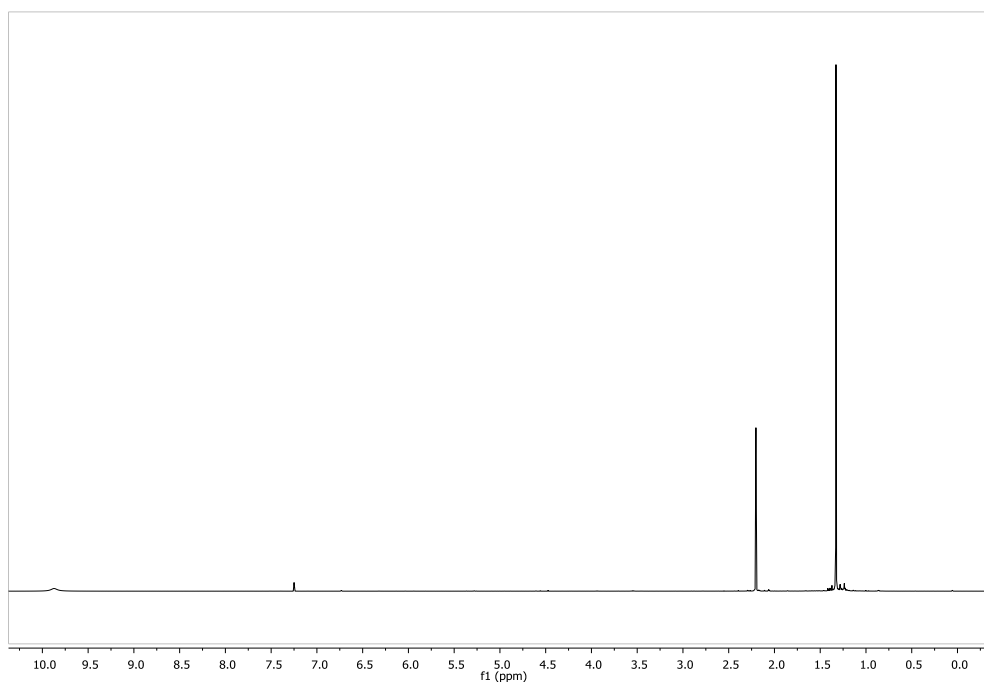

<sup>19</sup>F NMR (658 MHz, CDCl<sub>3</sub>, CFC<sub>3</sub>)

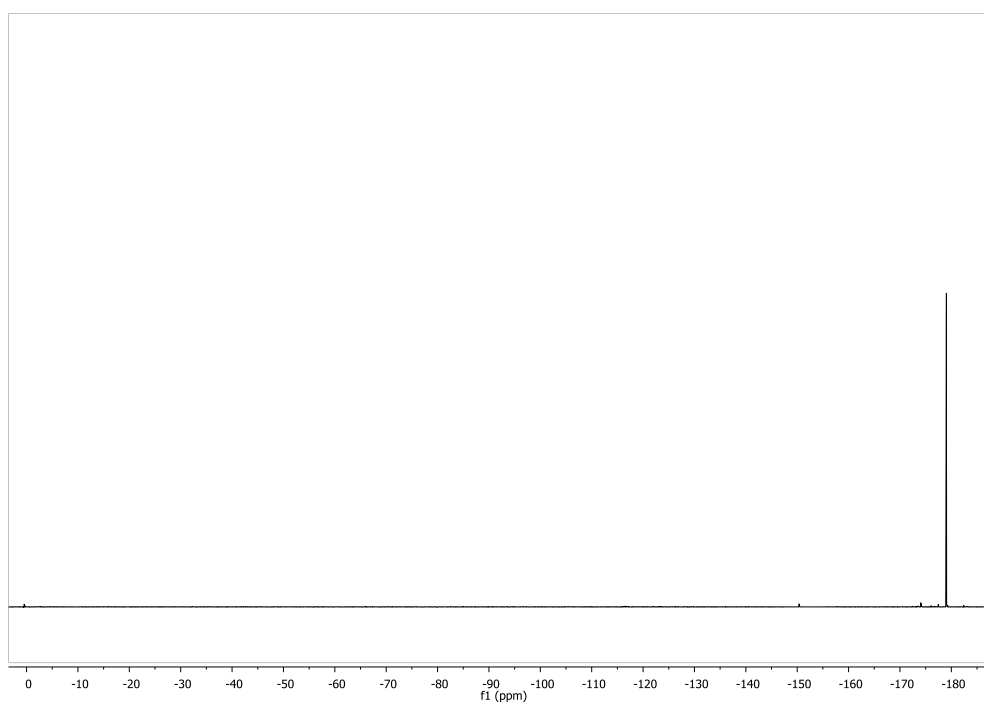

$^{13}\text{C}$  NMR (176 MHz,  $\text{CDCl}_3$ ,  $\text{Me}_4\text{Si}$ )

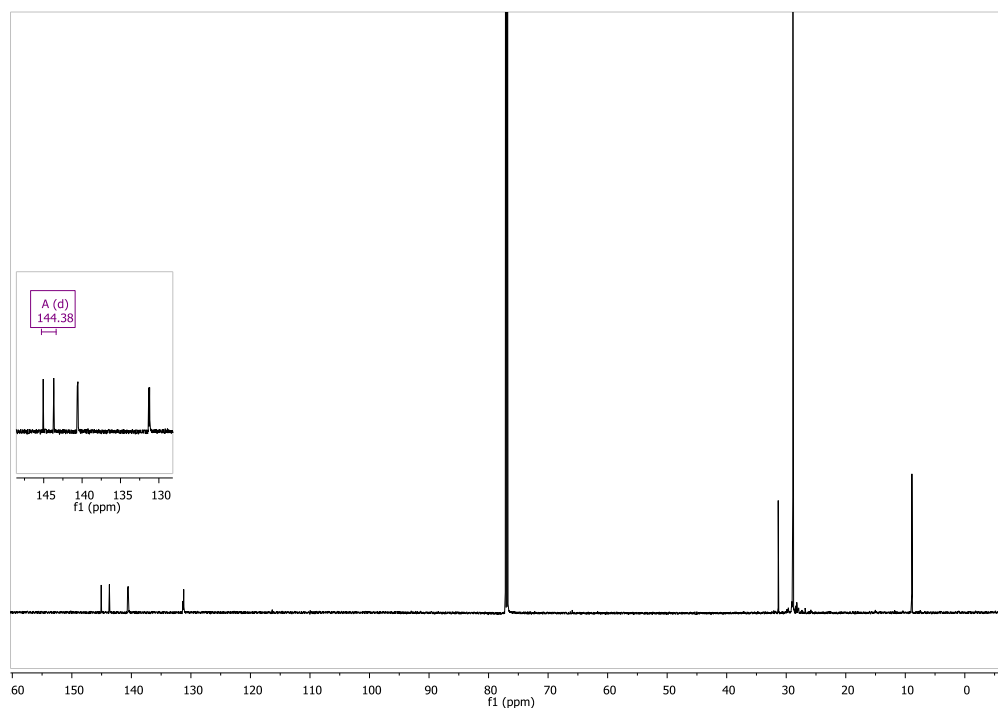

**3,5-Di-*tert*-butyl-4-fluoro-1*H*-pyrazole (4f)**

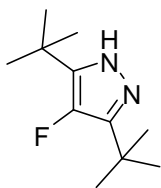

$^1\text{H}$  NMR (700 MHz,  $\text{CDCl}_3$ ,  $\text{Me}_4\text{Si}$ )

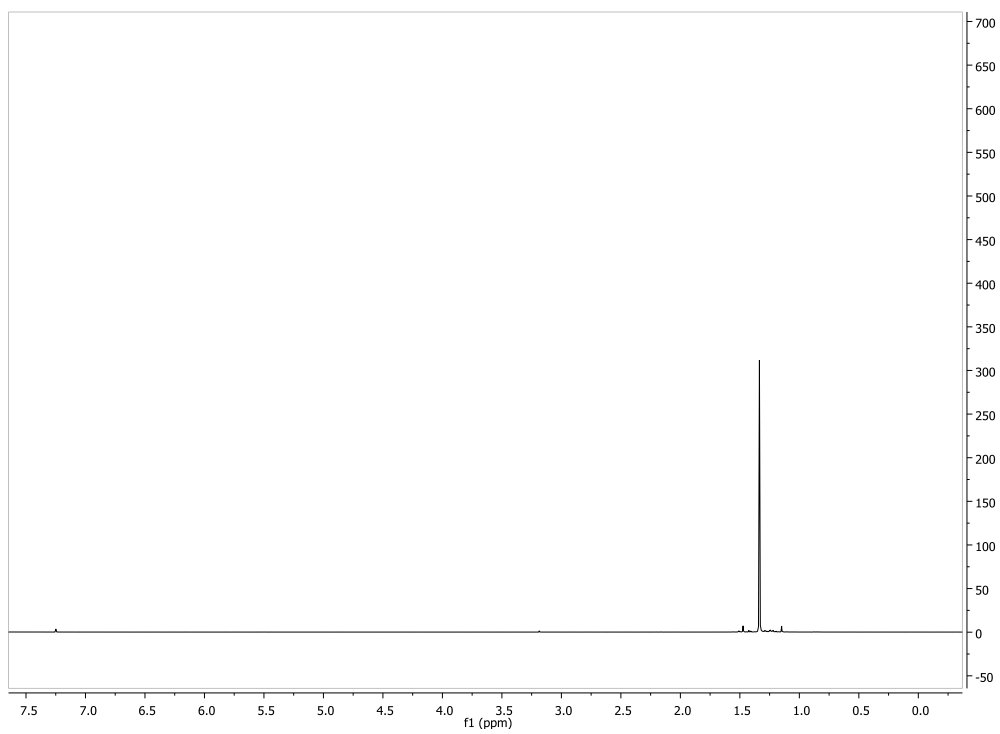

$^{19}\text{F}$  NMR (658 MHz,  $\text{CDCl}_3$ ,  $\text{CFCl}_3$ )

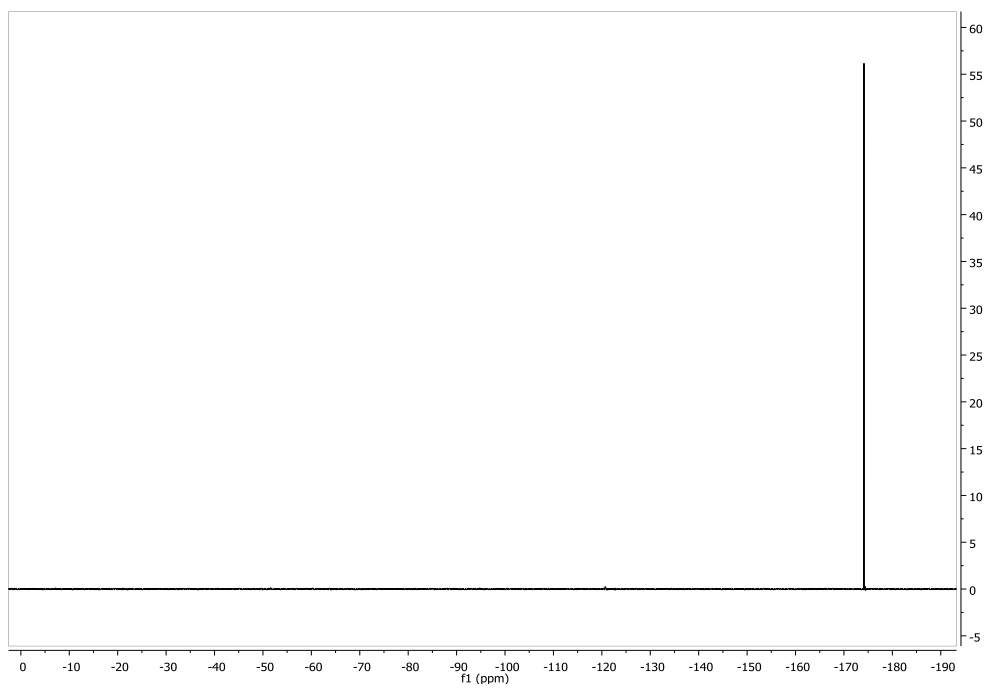

$^{13}\text{C}$  NMR (176 MHz,  $\text{CDCl}_3$ ,  $\text{Me}_4\text{Si}$ )

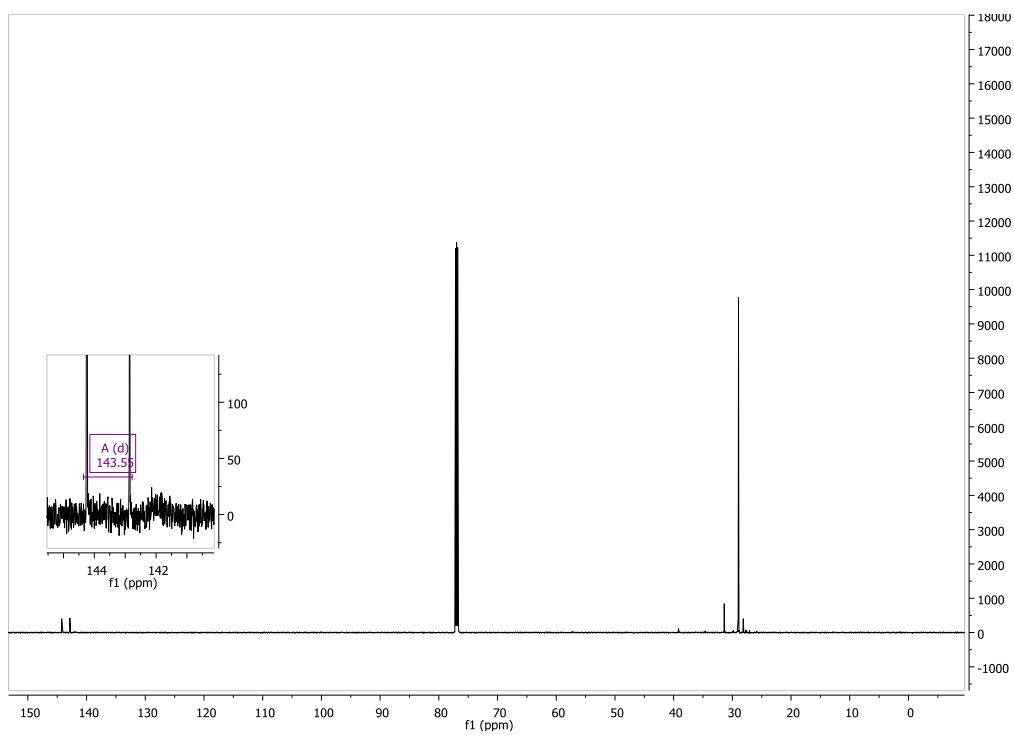

### 4-Fluoro-5-methyl-3-phenyl-1H-pyrazole (4g)

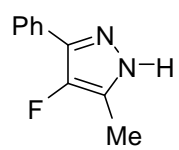

$^1\text{H}$  NMR (700 MHz,  $\text{CDCl}_3$ ,  $\text{Me}_4\text{Si}$ )

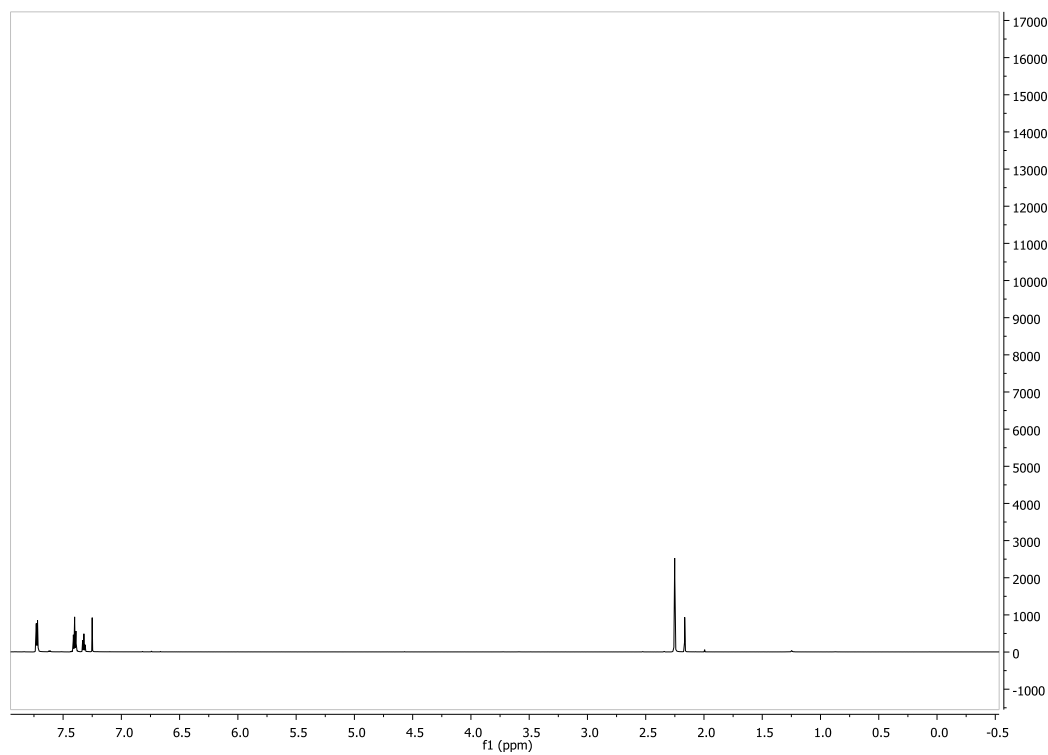

$^{19}\text{F}$  NMR (658 MHz,  $\text{CDCl}_3$ ,  $\text{CFCl}_3$ )

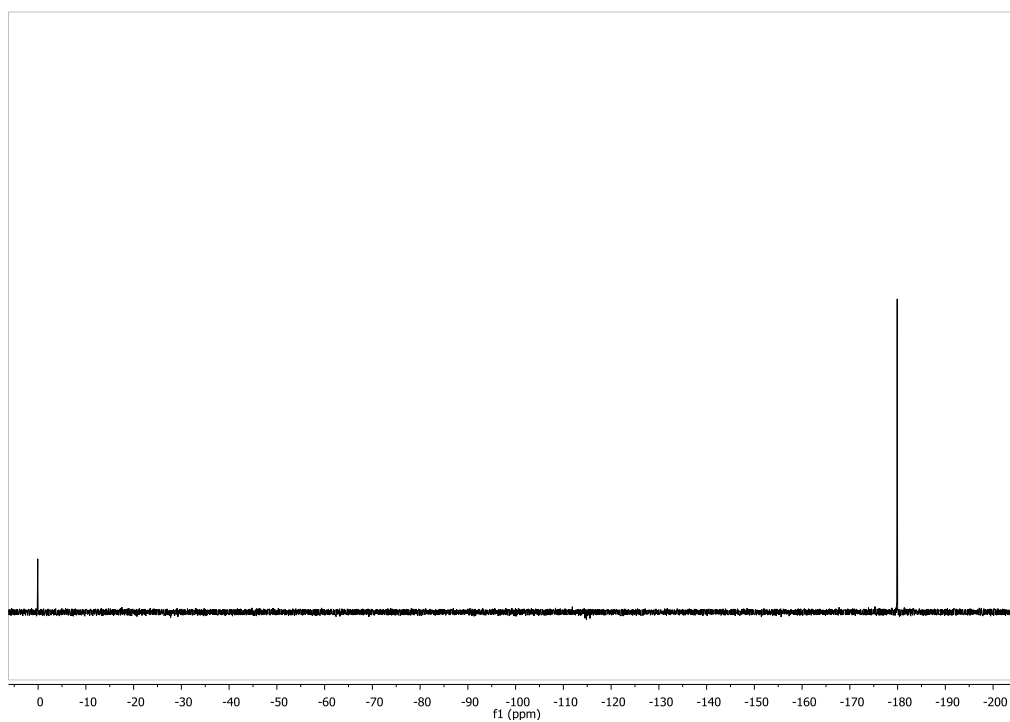

$^{13}\text{C}$  NMR (176 MHz,  $\text{CDCl}_3$ ,  $\text{Me}_4\text{Si}$ )

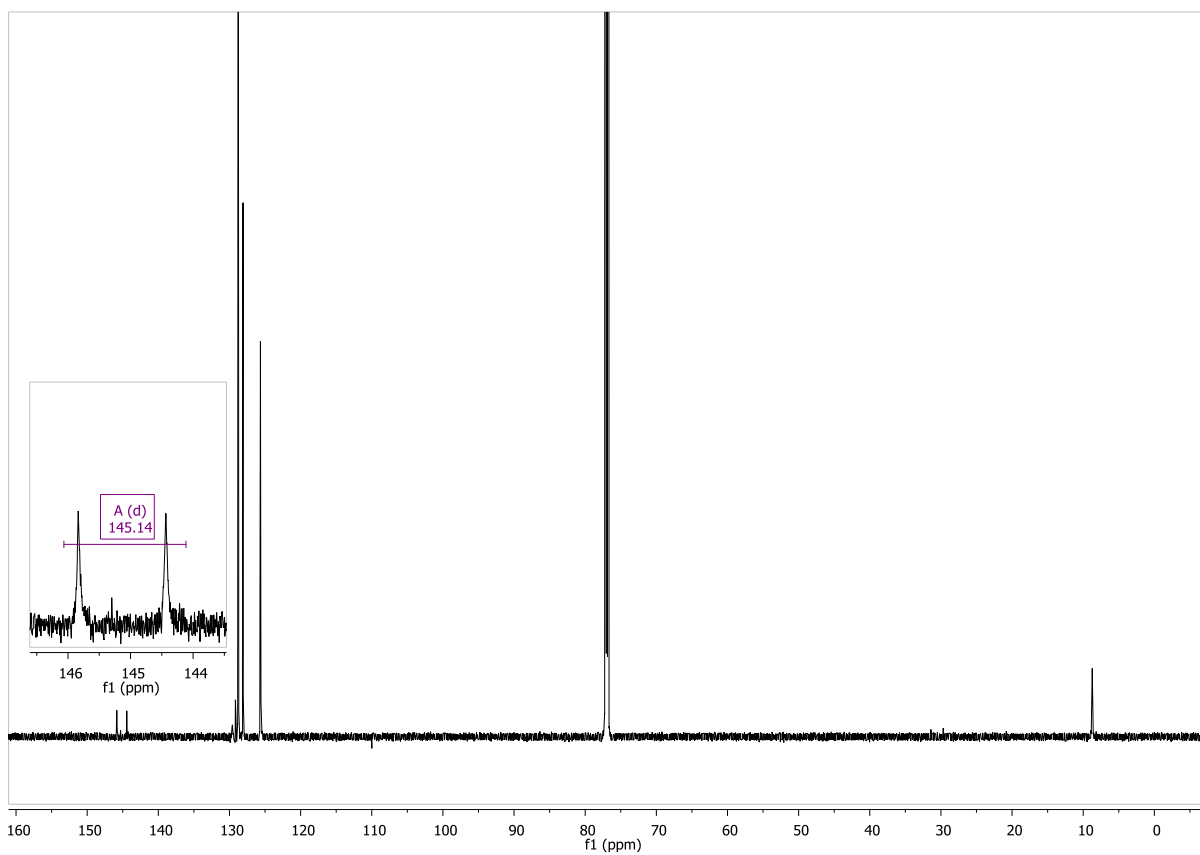

**3-tert-Butyl-4-fluoro-5-phenyl-1H-pyrazole (4h)**

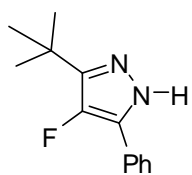

$^1\text{H}$  NMR (700 MHz,  $\text{CDCl}_3$ ,  $\text{Me}_4\text{Si}$ )

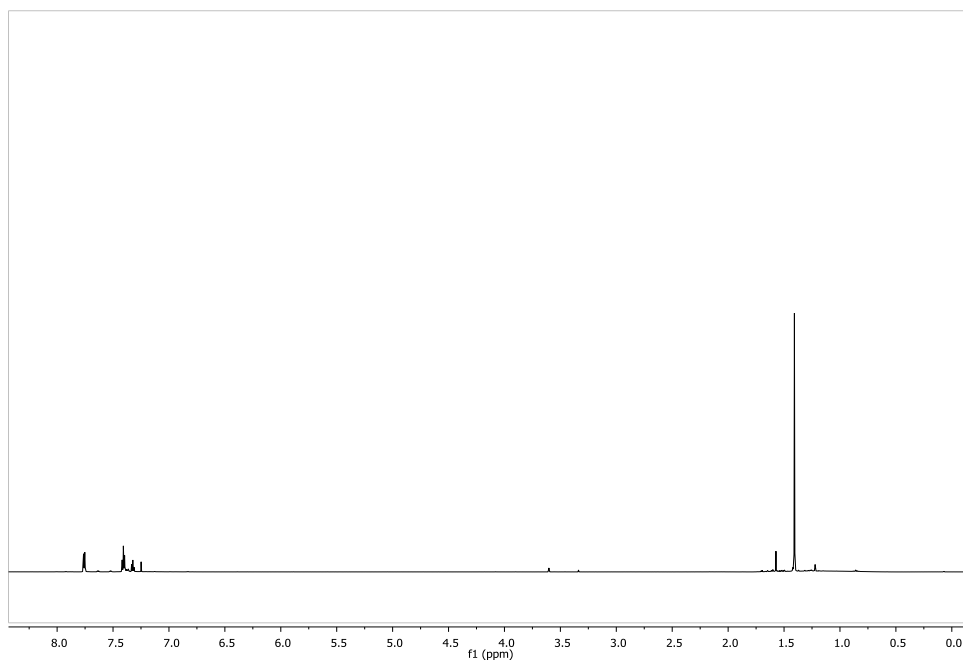

$^{19}\text{F}$  NMR (658 MHz,  $\text{CDCl}_3$ ,  $\text{CFCl}_3$ )

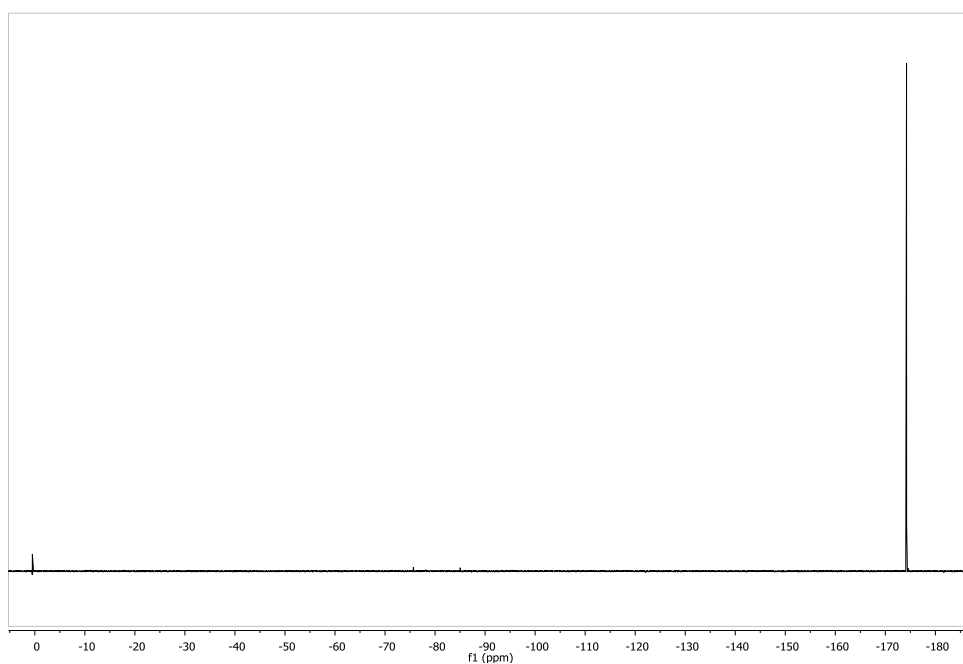



$^{13}\text{C}$  NMR (176 MHz,  $\text{CDCl}_3$ ,  $\text{Me}_4\text{Si}$ )

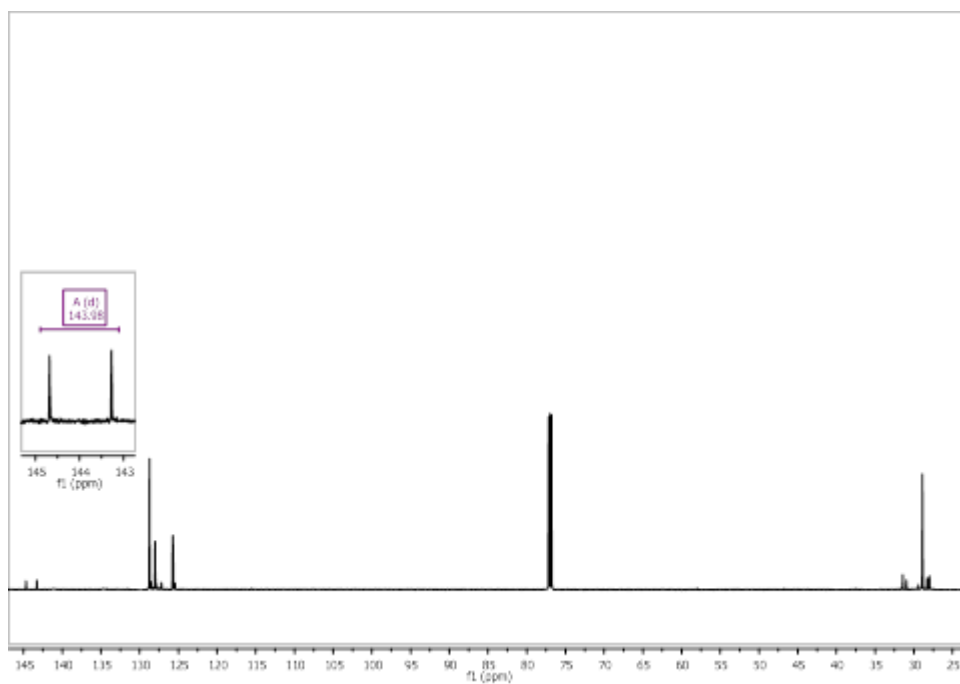

Supplement: Beilstein_J_Org_Chem-07-1048-s002.pdf [file Beilstein_J_Org_Chem-07-1048-s002.pdf]
