# Supplementary material for: Continuous gas/liquid–liquid/liquid flow synthesis of 4-fluoropyrazole derivatives by selective direct fluorination
Source: PubMed Central journal article supplement (PMC3168861; doi:10.3762/bjoc.7.120), 2011-08-02
Supplement: Beilstein_J_Org_Chem-07-1048-s001.pdf [file Beilstein_J_Org_Chem-07-1048-s001.pdf]

# Supporting Information File 1

for

## **Continuous gas/liquid–liquid/liquid flow synthesis of 4-fluoropyrazole derivatives by selective direct fluorination**

Jessica R. Breen<sup>1</sup>, Graham Sandford<sup>1\*</sup>, Dmitrii S. Yufit<sup>2</sup>, Judith A. K. Howard<sup>2</sup>, Jonathan Fray<sup>3</sup> and Bhairavi Patel<sup>3</sup>

Address: <sup>1</sup>Department of Chemistry, Durham University, South Road, Durham, DH1 3LE, UK; <sup>2</sup>Chemical Crystallography Group, Department of Chemistry, Durham University, South Road, Durham, DH1 3LE, UK and <sup>3</sup>Pfizer Global Research & Development, Ramsgate Road, Sandwich, Kent, CT13 9NJ, UK

Email: Graham Sandford\* - [Graham.Sandford@durham.ac.uk](mailto:Graham.Sandford@durham.ac.uk)

\*Corresponding author

## **Experimental data**

#### 4-Fluoro-1,3,5-trimethyl-1*H*-pyrazole (4b)

Pentane-2,4-dione (**1a**) (0.10 g, 1.0 mmol) in MeCN (4 mL, 2 mL/h), fluorine (18 mL/min), and methyl hydrazine (**3b**) (0.07 g, 1.5 mmol) in ethanol (4 mL, 2 mL/h), after recrystallization of the crude product from hexane gave 4-fluoro-1,3,5-trimethyl-1*H*-pyrazole (**4b**) (0.094 g, 73%) as yellow crystals; mp 83–85 °C; (Found:  $[M - H]^+$ , 127.0866.  $C_6H_9FN_2$  requires:  $[M - H]^+$ , 127.0871);  $^1H$  NMR (700 MHz,  $CDCl_3$ )  $\delta$  1.53 (3H, s,  $CH_3$ ), 1.78 (3H, s,  $CH_3$ ), 3.26 (3H, s,  $NCH_3$ );  $^{13}C$  NMR (176 MHz,  $CDCl_3$ )  $\delta$  7.94 (d,  $^3J_{CF} = 3.1$  Hz,  $CH_3$ ), 9.77 (d,  $^3J_{CF} = 3.0$  Hz,  $CH_3$ ), 36.4 (s,  $NCH_3$ ), 123.7 (d,  $^2J_{CF} = 25.8$  Hz, C-3), 133.0 (d,  $^2J_{CF} = 10.9$  Hz, C-5), 145.4 (d,  $^1J_{CF} = 241.1$  Hz, C-4);  $^{19}F$  NMR (658 MHz,  $CDCl_3$ )  $\delta$  -181.4 (s);  $m/z$  ( $ES^+$ ) 128.8 ( $[MH]^+$ , 100%).

#### 4-Fluoro-3,5-dimethyl-1-phenyl-1*H*-pyrazole (4c)

Pentane-2,4-dione (**1a**) (0.10 g, 1.0 mmol) in MeCN (4 mL, 2 mL/h), fluorine (18 mL/min) and phenyl hydrazine (**3c**) (0.162 g, 1.5 mmol) in ethanol (4 mL, 2 mL/h), after purification by column chromatography on silica gel with 1:1 hexane and ethyl acetate as the eluent, gave 4-fluoro-3,5-dimethyl-1-phenyl-1*H*-pyrazole (**4c**) (0.137 g, 72%) as a yellow oil; (Found:  $[M]^+$ , 190.0906.  $C_{11}H_{11}FN_2$  requires:  $[M]^+$ , 190.0906);  $^1H$  NMR (400 MHz,  $CDCl_3$ )  $\delta$  2.35 (3H, s,  $CH_3$ ), 2.37 (3H, s,  $CH_3$ ), 7.20–7.50 (5H, m, Ar-H);  $^{13}C$  NMR (126 MHz,  $CDCl_3$ )  $\delta$  9.7 (d,  $^3J_{CF} = 3.1$  Hz,  $CH_3$ ), 10.3 (d,  $^3J_{CF} = 3.0$  Hz,  $CH_3$ ), 124.4 (C-3'), 127.6 (C-4'), 129.4 (C-2'), 135.9 (d,  $^2J_{CF} = 11.2$  Hz, C-3), 140.1 (C-1'), 146.8 (d,  $^1J_{CF} = 243.4$  Hz, C-4);  $^{19}F$  NMR (376 MHz,  $CDCl_3$ )  $\delta$  -179.9 (s);  $m/z$  ( $EI^+$ ) 190.2 ( $[M]^+$ , 100%) 148.0 (24), 118.1 (32), 77.0 (50).

#### 3,5-Diethyl-4-fluoro-1*H*-pyrazole (4d)

Heptane-3,5-dione (**1b**) (0.13 g, 1.0 mmol) in MeCN (4 mL, 2 mL/h), fluorine (18 mL/min) and hydrazine monohydrate (**3a**) (0.075 g, 1.5 mmol) in MeCN (4 mL, 2 mL/h), after column

chromatography over silica gel with ethyl acetate as the eluent, gave 3,5-diethyl-4-fluoro-1*H*-pyrazole **4d** (0.102 g, 72 %) as pale yellow crystals; (Found:  $[M]^+$ , 142.0893.  $C_7H_{11}FN_2$  requires:  $[MH]^+$ , 142.0906);  $^1H$  NMR (400 MHz,  $CDCl_3$ )  $\delta$  1.21 (6H, t,  $^3J_{HF} = 7.7$  Hz,  $CH_3$ ), 2.58 (4H, q,  $^3J_{HF} = 7.6$  Hz,  $CH_2$ ), 11.5 (1H, bs, NH);  $^{13}C$  NMR (126 MHz,  $CDCl_3$ )  $\delta$  12.7 (s,  $CH_3$ ), 17.5 (s,  $CH_2$ ), 135.0 (br s, C-3), 144.6 (d,  $^1J_{CF} = 239.6$  Hz, C-4);  $^{19}F$  NMR (376 MHz,  $CDCl_3$ )  $\delta$  -184.7 (s);  $m/z$  ( $EI^+$ ) 142.6 ( $[M]^+$ , 100%), 127.0 (90), 113.1 (40), 83.1 (18) 59.1 (22).

#### **5-*tert*-Butyl-4-fluoro-3-methyl-1*H*-pyrazole (4e)**

5,5-Dimethylhexane-2,4-dione (**1e**) (0.16 g, 1.0 mmol) in MeCN (4 mL, 2 mL/h), fluorine (18 mL/min) and hydrazine monohydrate (**3a**) (0.075 g, 1.5 mmol) in MeCN (4 mL), after column chromatography over silica gel with 1:1 hexane and ethyl acetate as the eluent, gave 3-*tert*-butyl-4-fluoro-5-methyl-1*H*-pyrazole (**4e**) (0.11 g, 71%) as yellow crystals; mp 129–131 °C; (Found:  $[M]^+$ , 157.1131.  $C_8H_{13}FN_2$  requires:  $[M]^+$ , 157.1141);  $^1H$  NMR (400 MHz,  $CDCl_3$ )  $\delta$  1.34 (9H, s,  $C(CH_3)_3$ ), 2.21 (3H, s,  $CH_3$ );  $^{13}C$  NMR (126 MHz,  $CDCl_3$ )  $\delta$  9.11 (s,  $CH_3$ ), 29.2 (s,  $C(CH_3)_3$ ), 31.6 (s,  $C(CH_3)_3$ ), 131.5 (d,  $^2J_{CF} = 19.4$  Hz, C-5), 140.9 (d,  $^2J_{CF} = 15.5$  Hz, C-3), 144.4 (d,  $^1J_{CF} = 241.3$  Hz, C-4);  $^{19}F$  NMR (376 MHz,  $CDCl_3$ )  $\delta$  -179.9 (s);  $m/z$  ( $EI^+$ ) 156.1 ( $[M - H]^+$ , 100%), 141.1 (90), 113.1 (21), 101.1 (23).

#### **3,5-Di-*tert*-butyl-4-fluoro-1*H*-pyrazole (4f)**

2,2,6,6-Tetramethylheptane-3,5-dione (**1d**) (0.184 g, 1.0 mmol) in MeCN (4 mL, 2 mL/h), fluorine (18 mL/min) and hydrazine monohydrate (**3a**) (0.075 g, 1.5 mmol) in MeCN (4 mL, 2 mL/h) after recrystallization of the crude product from hexane gave 3,5-di-*tert*-butyl-4-fluoro-1*H*-pyrazole (**4f**) (0.148 g, 74 %) as yellow crystals; mp 176–178 °C; (Found  $[MH]^+$ , 199.1605  $C_{11}H_{19}FN_2$  requires:  $[MH]^+$ , 199.1605);  $^1H$  NMR (700 MHz,  $CDCl_3$ )  $\delta$  1.33 (s,

CH<sub>3</sub>); <sup>13</sup>C NMR (176 MHz, CDCl<sub>3</sub>) δ 28.9 (d, <sup>4</sup>J<sub>CF</sub> = 1.8 Hz, C(CH<sub>3</sub>)<sub>3</sub>), 31.4 (d, <sup>3</sup>J<sub>CF</sub> = 3.4 Hz, C(CH<sub>3</sub>)<sub>3</sub>), 142.1 (bm, C-3) 143.6 (d, <sup>1</sup>J<sub>CF</sub> = 243.1 Hz, C-4); <sup>19</sup>F NMR (658 MHz, CDCl<sub>3</sub>) δ -174.5 (s); *m/z* (EI<sup>+</sup>) 198.2 ([M]<sup>+</sup>, 100%), 183.2 (66), 127.1 (22), 57.2 (42).

#### 4-Fluoro-3-methyl-5-phenyl-1*H*-pyrazole (4g)

1-Phenylbutane-1,3-dione (**1e**) (0.162g, 1.0 mmol) in MeCN (4 mL, 2 mL/h), fluorine (18 mL/min) and hydrazine monohydrate (**3a**) (0.075 g, 1.5 mmol) in MeCN (4 mL, 2 mL/h), after column chromatography on silica gel with 7:3 hexane and ethyl acetate as the eluent, gave 4-fluoro-5-methyl-3-phenyl-1*H*-pyrazole (**4g**) (0.121 g, 69%) as white crystals; mp 136–138 °C; (Found: [MH]<sup>+</sup>, 177.0831. C<sub>10</sub>H<sub>9</sub>FN<sub>2</sub> requires: [MH]<sup>+</sup>, 177.0750); <sup>1</sup>H NMR (400 MHz, CDCl<sub>3</sub>) δ 2.04 (3H, s, CH<sub>3</sub>), 7.31–7.76 (5H, m, Ar-H), 7.79 (1H, bs, NH); <sup>13</sup>C NMR (126 MHz, CDCl<sub>3</sub>) δ 8.7 (CH<sub>3</sub>), 125.6 (d, <sup>2</sup>J<sub>CF</sub> = 3.8 Hz, C-5), 128.1 (Ar), 128.8 (Ar), 129.2 (C-3), 145.1 (d, <sup>1</sup>J<sub>CF</sub> = 246.8 Hz, C-4); <sup>19</sup>F NMR (376 MHz, CDCl<sub>3</sub>) δ -179.9 (s); *m/z* (EI<sup>+</sup>) 176.1 ([M]<sup>+</sup>, 100%), 145.9 (22), 108.1 (17), 77.0 (35).

#### 3-*tert*-Butyl-4-fluoro-5-phenyl-1*H*-pyrazole (4h)

5,5-Dimethyl-1-phenylpentane-2,4-dione (**1f**) (0.20 g, 1.0 mmol) in MeCN (4 mL, 2 mL/h) and hydrazine monohydrate (**3a**) (0.075 g, 1.5 mmol) in MeCN (4 mL, 2 mL/h), after column chromatography on silica gel with 7:3 hexane and ethyl acetate as the eluent, gave 3-*tert*-butyl-4-fluoro-5-phenyl-1*H*-pyrazole (**4h**) (0.174 g, 80%) as a yellow oil; (Found: [MH]<sup>+</sup>, 219.1303. C<sub>13</sub>H<sub>15</sub>FN<sub>2</sub> requires: [MH]<sup>+</sup>, 219.1298); <sup>1</sup>H NMR (400 MHz, CDCl<sub>3</sub>) δ 1.37 (9H, s, CH<sub>3</sub>), 7.44–7.80 (5H, m, Ar-H); <sup>13</sup>C NMR (126 MHz, CDCl<sub>3</sub>) δ 28.9 (C(CH<sub>3</sub>)<sub>3</sub>), 31.4 (C(CH<sub>3</sub>)<sub>3</sub>), 125.7 (Ar), 128.0 (Ar), 128.7 (Ar), 134.5 (C-3), 141.1 (C-5), 143.9 (d, <sup>1</sup>J<sub>CF</sub> = 247.3 Hz, C-4); <sup>19</sup>F NMR (376 MHz, CDCl<sub>3</sub>) δ -174.7 (s); *m/z* (EI<sup>+</sup>) 218.1 ([M]<sup>+</sup>, 100%), 203.1 (98), 175.0 (32), 163.1 (36), 87.6 (37).

## X-ray crystallography

Single crystal X-ray data were collected on Oxford Diffraction Xcalibur Gemini (**4a**) and Bruker SMART 6000 (**4f**) diffractometers equipped with Cryostream (Oxford Cryosystems) nitrogen coolers, at 100 and 120 K, respectively, using graphite-monochromated MoK $\alpha$  radiation ( $\lambda = 0.71073 \text{ \AA}$ ). Both structures were solved by direct methods and refined by full-matrix least squares on  $F^2$  for all data using SHELXL [1] and OLEX2 [2] software. All non-disordered non-hydrogen atoms were refined with anisotropic displacement parameters, non-disordered H-atoms in **4a** were located on the difference map and refined isotropically, all H atoms in **4f** were placed in calculated positions and refined in “riding” mode.

Crystallographic data for structures **4a** and **4f** have been deposited with the Cambridge Crystallographic Data Centre as supplementary publications CCDC-829883 and CCDC-829884.

*Crystal data for 4a:* C<sub>5</sub>H<sub>7</sub>FN<sub>2</sub>, M = 114.13, trigonal, space group R-3c, a = 12.0738(4), c = 20.3220(9) Å, U = 2565.6(2) Å<sup>3</sup>, F(000) = 1080, Z = 18, D<sub>c</sub> = 1.330 mg m<sup>-3</sup>,  $\mu = 0.107 \text{ mm}^{-1}$ . 8329 reflections yielded 767 unique data ( $R_{\text{merg}} = 0.0471$ ). Final  $wR_2(F^2) = 0.1266$  for all data (50 refined parameters), conventional  $R_1(F) = 0.0445$  for 634 reflections with  $I > 2\sigma$ , GOF = 1.047.

*Crystal data for 4f:* C<sub>11</sub>H<sub>19</sub>FN<sub>2</sub>, M = 198.28, tetragonal, space group I4<sub>1</sub>/a, a = 27.1537(9), c = 12.4112(4) Å, U = 9151.1(5) Å<sup>3</sup>, F(000) = 3456, Z = 32, D<sub>c</sub> = 1.151 mg m<sup>-3</sup>,  $\mu = 0.080 \text{ mm}^{-1}$ . 59470 reflections yielded 5790 unique data ( $R_{\text{merg}} = 0.0782$ ). Final  $wR_2(F^2) = 0.1994$  for all data (266 refined parameters), conventional  $R_1(F) = 0.0754$  for 4844 reflections with  $I > 2\sigma$ , GOF = 1.064.

## References

1. Sheldrick, G. M. *Acta Cryst.* **2008**, *A64*, 112–122. doi:10.1107/S0108767307043930
2. Dolomanov, O. V.; Bourhis, L. J.; Gildea, R. J.; Howard, J. A. K.; Puschmann, H. J. *Appl. Cryst.* **2009**, *42*, 339–341. doi:10.1107/S0021889808042726
